# Supplementary material for: A genetic toolkit and gene switches to limit Mycoplasma growth for biosafety applications
Source: Nat Commun. 2022 Apr 7;13:1910. doi: 10.1038/s41467-022-29574-0 (PMC8991246; doi:10.1038/s41467-022-29574-0)
Supplement: Supplementary file 9 — Supplementary Data 4 [file 41467_2022_29574_MOESM9_ESM.xlsx]

## Sheet: GeneDisruption
Gene	Growth when disruption	Growth change (%)			Growth in WT:
MPN050	0.0549759	4.38403e-08
MPN306	0.0549759	4.13639e-10			0.0549759
MPN460	0.0549759	4.13639e-10
MPN685	0.0549759	4.13639e-10
MPN304	0.0549759	4.13639e-10
MPN195	0.0549759	4.13639e-10
MPN057	0.0549759	4.13639e-10
MPN305	0.0549759	4.13639e-10
MPN056	0.0549759	4.13639e-10
MPN653	0.0549759	4.13639e-10
MPN209	0.0549759	4.13639e-10
MPN677	0.0549759	4.13639e-10
MPN651	0.0549759	4.13639e-10
MPN517	0.0549759	4.13639e-10
MPN560	0.0549759	4.13639e-10
MPN055	0.0549759	4.13639e-10
MPN382	0.0549759	2.06819e-10
MPN493	0.0549759	2.06819e-10
MPN240	0.0549759	-2.06807e-10
MPN497	0.0549759	-2.06807e-10
MPN043	0.0549759	-4.13626e-10
MPN073	0.0549759	-6.20445e-10
MPN573	0.0549759	-6.20445e-10
MPN496	0.0549759	-6.20445e-10
MPN002	0.0549759	-6.20445e-10
MPN609	0.0549759	-6.20445e-10
MPN108	0.0549759	-6.20445e-10
MPN434	0.0549759	-6.20445e-10
MPN120	0.0549759	-6.20445e-10
MPN479	0.0549759	-6.20445e-10
MPN079	0.0549759	-6.20445e-10
MPN323	0.0549759	-6.20445e-10
MPN495	0.0549759	-6.20445e-10
MPN574	0.0549759	-6.20445e-10
MPN322	0.0549759	-6.20445e-10
MPN494	0.0549759	-6.20445e-10
MPN078	0.0549759	-6.20445e-10
MPN610	0.0549759	-6.20445e-10
MPN611	0.0549759	-6.20445e-10
MPN324	0.0549759	-6.20445e-10
MPN492	0.0549759	-8.27264e-10
MPN135	0.0549759	-1.44753e-09
MPN134	0.0549759	-1.44753e-09
MPN136	0.0549759	-1.44753e-09
MPN133	0.0549759	-1.44753e-09
MPN320	0.0549759	-4.34262e-09
MPN321	0.0549759	-8.06498e-09
MPN300	0.0549759	-8.06498e-09
MPN652	0.0549759	-1.48892e-08
MPN498	0.0549759	-2.27474e-08
MPN267	0.0549755	-0.000654497
MPN033	0.0549499	-0.0472187
MPN044	0.0546736	-0.549839
MPN185	0.0546736	-0.549839
MPN063	0.0546137	-0.658795
MPN564	0.0546137	-0.658795
MPN259	0.0543487	-1.14076
MPN260	0.0543487	-1.14076
MPN258	0.0543487	-1.14076
MPN062	0.0542994	-1.23044
MPN386	0.0539367	-1.89034
MPN082	0.053821	-2.10073
MPN595	0.053821	-2.10073
MPN251	0.053821	-2.10073
MPN064	0.0537973	-2.14375
MPN547	0.0529458	-3.69267
MPN664	0.0529458	-3.69267
MPN472	0.0529458	-3.69267
MPN445	0.0528677	-3.83469
MPN420	0.0528677	-3.83469
MPN421	0.0528547	-3.85847
MPN065	0.0522392	-4.97797
MPN051	0.0511284	-6.99848
MPN307	0.05024	-8.61455
MPN306	0.05024	-8.61455
MPN395	0.0388253	-29.3775
MPN674	0.0111038	-79.8025
MPN667	8.61746e-11	-100
MPN006	2.93312e-11	-100
MPN637	1.81899e-12	-100
MPN455	1.59162e-12	-100
MPN253	1.59162e-12	-100
MPN350	3.41061e-13	-100
MPN603	0	-100
MPN336	0	-100
MPN629	0	-100
MPN299	0	-100
MPN034	0	-100
MPN207	0	-100
MPN528	0	-100
MPN236	0	-100
MPN060	0	-100
MPN017	0	-100
MPN553	0	-100
MPN252	0	-100
MPN378	0	-100
MPN600	0	-100
MPN303	0	-100
MPN302	0	-100
MPN561	0	-100
MPN430	0	-100
MPN516	0	-100
MPN480	0	-100
MPN628	0	-100
MPN047	0	-100
MPN356	0	-100
MPN597	0	-100
MPN402	0	-100
MPN669	0	-100
MPN257	0	-100
MPN672	0	-100
MPN256	0	-100
MPN532	0	-100
MPN106	0	-100
MPN105	0	-100
MPN576	0	-100
MPN392	0	-100
MPN066	0	-100
MPN237	0	-100
MPN390	0	-100
MPN678	0	-100
MPN384	0	-100
MPN520	0	-100
MPN298	0	-100
MPN627	0	-100
MPN483	0	-100
MPN543	0	-100
MPN005	0	-100
MPN598	0	-100
MPN602	0	-100
MPN045	0	-100
MPN277	0	-100
MPN250	0	-100
MPN238	0	-100
MPN599	0	-100
MPN046	0	-100
MPN601	0	-100
MPN394	0	-100
MPN418	0	-100
MPN562	0	-100
MPN604	0	-100
MPN476	0	-100
MPN023	0	-100
MPN348	0	-100
MPN556	0	-100
MPN429	0	-100
MPN632	0	-100
MPN246	0	-100
MPN391	0	-100
MPN354	0	-100
MPN158	0	-100
MPN025	0	-100
MPN550	0	-100
MPN428	0	-100
MPN533	0	-100
MPN393	0	-100
